# Supplementary material
Source: MDPI journal article supplement (https://www.mdpi.com/2071-1050/13/11/6126)
Supplement: s1 [file s1]

Supplementary Materials S1. Detailed results of on-site observation

Table S1 GOAL 1 evaluation: Accessibility

|                                                                                                                                                                                                                                                                                                                               | MANGGHA COMPLEX                                                                                                       | WYSPIANSKI PAVILION                                                                                                         | AUDITORIUM MAXIMUM                                                                                                                                                                                               | OPERA HOUSE                                                                                                              | MOS                                                                                          | CRICOTEKA                                                                           | MOCAK                                                                                                         | ICE                                                                                                                                                              | CZAPSKI PAVILION                                                                                                                     |
|-------------------------------------------------------------------------------------------------------------------------------------------------------------------------------------------------------------------------------------------------------------------------------------------------------------------------------|-----------------------------------------------------------------------------------------------------------------------|-----------------------------------------------------------------------------------------------------------------------------|------------------------------------------------------------------------------------------------------------------------------------------------------------------------------------------------------------------|--------------------------------------------------------------------------------------------------------------------------|----------------------------------------------------------------------------------------------|-------------------------------------------------------------------------------------|---------------------------------------------------------------------------------------------------------------|------------------------------------------------------------------------------------------------------------------------------------------------------------------|--------------------------------------------------------------------------------------------------------------------------------------|
| VISUAL ACCESSIBILITY                                                                                                                                                                                                                                                                                                          |                                                                                                                       |                                                                                                                             |                                                                                                                                                                                                                  |                                                                                                                          |                                                                                              |                                                                                     |                                                                                                               |                                                                                                                                                                  |                                                                                                                                      |
| 0-3 points for distance, 0-2 points for the number of directions (1 direction - 0, 2 directions – 1 point, 3 directions or more/panoramic view – 2 points)                                                                                                                                                                    | wide panoramic view from the other bank of the Vistula River, far views from the adjoining streets                    | far views from the adjoining streets                                                                                        | the front of the building facing the street, the backyard invisible from the street, the facility visible from 2 points, distance: about 180 and 200m                                                            | far views from the adjoining streets                                                                                     | further views of the two streets adjacent to the building                                    | wide panoramic view from the other bank of the Vistula River                        | the museum is hidden among the surrounding buildings, a concrete wall with the logo is visible from the front | far views from the adjoining streets and a wide panoramic view from the other bank of the Vistula River                                                          | the pavilion is hidden behind the front buildings on Pilsudskiego St.                                                                |
| G1.1                                                                                                                                                                                                                                                                                                                          | 5                                                                                                                     | 5                                                                                                                           | 3                                                                                                                                                                                                                | 5                                                                                                                        | 4                                                                                            | 5                                                                                   | 3                                                                                                             | 5                                                                                                                                                                | 2                                                                                                                                    |
| PEDESTRIAN-FRIENDLY ENVIRONMENT                                                                                                                                                                                                                                                                                               |                                                                                                                       |                                                                                                                             |                                                                                                                                                                                                                  |                                                                                                                          |                                                                                              |                                                                                     |                                                                                                               |                                                                                                                                                                  |                                                                                                                                      |
| Assessment based on limited traffic zone, condition of sidewalks, number of parking places, etc. Evaluation based on the observation of parked cars                                                                                                                                                                           | inconvenient (busy road), pedestrian barrier, but sufficient number of parking places and good condition of sidewalks | convenient (limited traffic zone), good condition of sidewalks, no pedestrian barriers, sufficient number of parking places | partly convenient (limited traffic zone but busy road nearby), good condition of sidewalks, sufficient number of parking places for the building users but many cars parked outside forming a pedestrian barrier | inconvenient (busy road forming a pedestrian barrier), cars parked before the main entrance, good condition of sidewalks | convenient (limited traffic zone), damaged pathways, no cars parked in front of the building | convenient, limited traffic zone, too many cars parked in front of the building     | convenient, limited traffic zone, cars parked inside the museum courtyard                                     | a busy road nearby forming a barrier for pedestrians, good condition of sidewalks, enough park places daily (not during collective events)                       | convenient (limited traffic zone), good pathways, no cars parked before the building                                                 |
| G1.2                                                                                                                                                                                                                                                                                                                          | 2                                                                                                                     | 5                                                                                                                           | 2                                                                                                                                                                                                                | 1                                                                                                                        | 4                                                                                            | 4                                                                                   | 4                                                                                                             | 3                                                                                                                                                                | 5                                                                                                                                    |
| DISTANCE FROM THE NEAREST PUBLIC TRANSPORT STOP + ACCESS FOR THE WHEELCHAIR USERS                                                                                                                                                                                                                                             |                                                                                                                       |                                                                                                                             |                                                                                                                                                                                                                  |                                                                                                                          |                                                                                              |                                                                                     |                                                                                                               |                                                                                                                                                                  |                                                                                                                                      |
| Points for the distance from the nearest public transport stop: 0 - over 400m, 1 point - 300-400m, 2 points - 200-300m, 3 points - less than 200m. Points for access for the wheelchair users: 0- impossible, 1 point -by a wheelchair ramp, with some difficulties, 2points - very good, direct access from the ground level | about 125m from a bus stop, a wheelchair ramp                                                                         | about 50m from a tram stop, wheelchair access to the main entrance from the ground level                                    | about 225m from a bus stop, stairs before the main entrance, wheelchair access by a ramp                                                                                                                         | about 250m from a tram stop, wheelchair access to the main entrance from the ground level                                | about 300m, wheelchair access to the main entrance from the ground level                     | 350m from a tram stop, wheelchair access to the main entrance from the ground level | 350m (from railway station), wheelchair access to the main entrance from the ground level                     | about 250m from a bus stop, wheelchair access to the main entrance from the ground level but from the roundabout the building is surrounded with external stairs | about 150m from a tram stop, wheelchair access to the main entrance from the ground level but complicated by the cobblestone pathway |
| G1.3                                                                                                                                                                                                                                                                                                                          | 4                                                                                                                     | 5                                                                                                                           | 3                                                                                                                                                                                                                | 3                                                                                                                        | 4                                                                                            | 3                                                                                   | 3                                                                                                             | 4                                                                                                                                                                | 4                                                                                                                                    |
| BIKE MOVEMENT INFRASTRUCTURE, NUMBER OF BICYCLE STANDS                                                                                                                                                                                                                                                                        |                                                                                                                       |                                                                                                                             |                                                                                                                                                                                                                  |                                                                                                                          |                                                                                              |                                                                                     |                                                                                                               |                                                                                                                                                                  |                                                                                                                                      |
| Max. 2 points for bicycle stands; max. 3 points for standard of routes cycling infrastructure: 0- riding in traffic, 1 point- shared-use path, 2 points-bicycle lane, 3 point -two or more bicycle lanes in various directions                                                                                                | a shared-use path, 10 bicycle stands                                                                                  | a shared-use path or riding in traffic, 4 bicycle stands                                                                    | riding in traffic, 20 bicycle stands                                                                                                                                                                             | about 10 bike stands, a short bicycle lane connected to a road                                                           | about 10 bike stands, bicycle lace                                                           | about 40 bike stands, bicycle lace                                                  | 9 bicycle stands, riding with pedestrians or in (moderate) traffic                                            | about 30 bicycle stands,                                                                                                                                         | riding down the street among cars, no bicycle stands                                                                                 |
| G1.4                                                                                                                                                                                                                                                                                                                          | 2                                                                                                                     | 2                                                                                                                           | 2                                                                                                                                                                                                                | 2                                                                                                                        | 3                                                                                            | 4                                                                                   | 2                                                                                                             | 5                                                                                                                                                                | 0                                                                                                                                    |
| SUM OF POINTS                                                                                                                                                                                                                                                                                                                 | 13                                                                                                                    | 17                                                                                                                          | 10                                                                                                                                                                                                               | 11                                                                                                                       | 15                                                                                           | 16                                                                                  | 12                                                                                                            | 17                                                                                                                                                               | 11                                                                                                                                   |

| Table S2 GOAL 2 evaluation: Mix of functions                                                                                                                                                              |                                                                                              |                                                                                                                                                            |                                                                                                                                 |                                                    |                                                                                                                                         |                                                                                              |                                                                                        |                                                                                                                                                 |                                                                                                  |
|-----------------------------------------------------------------------------------------------------------------------------------------------------------------------------------------------------------|----------------------------------------------------------------------------------------------|------------------------------------------------------------------------------------------------------------------------------------------------------------|---------------------------------------------------------------------------------------------------------------------------------|----------------------------------------------------|-----------------------------------------------------------------------------------------------------------------------------------------|----------------------------------------------------------------------------------------------|----------------------------------------------------------------------------------------|-------------------------------------------------------------------------------------------------------------------------------------------------|--------------------------------------------------------------------------------------------------|
|                                                                                                                                                                                                           | MANGGHA<br>COMPLEX                                                                           | WYSPIANSKI<br>PAVILION                                                                                                                                     | AUDITORIUM<br>MAXIMUM                                                                                                           | OPERA HOUSE                                        | MOS                                                                                                                                     | CRICOTEKA                                                                                    | MOCAK                                                                                  | ICE                                                                                                                                             | CZAPSKI PAVILION                                                                                 |
| FUNCTIONS IN THE BUILDING(S)                                                                                                                                                                              |                                                                                              |                                                                                                                                                            |                                                                                                                                 |                                                    |                                                                                                                                         |                                                                                              |                                                                                        |                                                                                                                                                 |                                                                                                  |
| 1 point for each function                                                                                                                                                                                 | 3: galleries, auditorium, restaurant                                                         | 2: gallery, info point (shop),                                                                                                                             | 2: auditoriums, bistro,                                                                                                         | 1: opera with auxiliary spaces                     | >5: multifunctional halls (theatre, film, dance, music), gallery, cafe, bookshop, library                                               | 4: gallery, bookshop, cafe, concert hall                                                     | 4: gallery, audiovisual hall, cafe, library,                                           | 5: 2 multifunctional halls, gallery space, cafe, shop, bakery                                                                                   | 4: gallery, cafe, library, outdoor cinema                                                        |
| G 2.1                                                                                                                                                                                                     | 3                                                                                            | 2                                                                                                                                                          | 2                                                                                                                               | 1                                                  | 5                                                                                                                                       | 4                                                                                            | 4                                                                                      | 5                                                                                                                                               | 4                                                                                                |
| ARRANGEMENT, ACCESSIBILITY OF FUNCTIONS                                                                                                                                                                   |                                                                                              |                                                                                                                                                            |                                                                                                                                 |                                                    |                                                                                                                                         |                                                                                              |                                                                                        |                                                                                                                                                 |                                                                                                  |
| 1 point for each feature: more than one entrance for users, access from different sides of the building, at different times of the day, access without opening the facility (or its main space), free use | more than one entrance for users, access from different sides, at different times of the day | two functions on two sides of the building, (no recreational functions); a shop-and-info point has an independent entrance from the exhibition, free entry | more than one entrance for users, access from different sides, at different times of the day, free use (during public lectures) | none                                               | more than one entrance for users, access from different sides, at different times of the day and without opening the facility, free use | more than one entrance for users, access from different sides, at different times of the day | more than one entrance for users, access from different sides                          | more than one entrance for users, access from different sides, at different times of the day, without opening the facility (or its main space), | access at different times of the day, without opening the facility (or its main space), free use |
| G 2.2                                                                                                                                                                                                     | 3                                                                                            | 5                                                                                                                                                          | 3                                                                                                                               | 0                                                  | 5                                                                                                                                       | 3                                                                                            | 2                                                                                      | 4                                                                                                                                               | 3                                                                                                |
| FUNCTIONS IN THE IMMEDIATE SURROUNDING                                                                                                                                                                    |                                                                                              |                                                                                                                                                            |                                                                                                                                 |                                                    |                                                                                                                                         |                                                                                              |                                                                                        |                                                                                                                                                 |                                                                                                  |
| 1 point for each function                                                                                                                                                                                 | apartments, commercial premises, hotel, language school, fitness                             | the town hall, shops, bars, pharmacy, apartment houses, church, episcopal curia, etc.                                                                      | 2 university buildings in the immediate vicinity, consulate                                                                     | offices, residential buildings, shops, post office | hotels, apartments, library, kindergarten, bistro, restaurant, beautician                                                               | apartments, bistro, optician, beauty salon, hairdresser, commercial premises                 | Schindler's Factory museum, restaurants and bistros, apartments, offices, glass centre | hotels, bistros, doctor's offices, the Krakow Festival Office building, apartments, hairdresser, law offices, graphic studio, vacancy           | museum, garden                                                                                   |
| G 2.3                                                                                                                                                                                                     | 5                                                                                            | 5                                                                                                                                                          | 2                                                                                                                               | 4                                                  | 5                                                                                                                                       | 5                                                                                            | 5                                                                                      | 5                                                                                                                                               | 2                                                                                                |
| INCLUSIVE FUNCTIONS IN PUBLIC SPACE                                                                                                                                                                       |                                                                                              |                                                                                                                                                            |                                                                                                                                 |                                                    |                                                                                                                                         |                                                                                              |                                                                                        |                                                                                                                                                 |                                                                                                  |
| 1 point for each: the building's functions in the outdoor space, functions in the streetscape near the building, functions for children and seniors, health-promoting functions or NGOs                   | café with tables outside, bamboo garden                                                      | the town hall, local functions also in the street (cafes, kiosks, street stalls, etc.)                                                                     | café with tables outside                                                                                                        | none                                               | café with tables outside, kinder garden with an adjacent garden                                                                         | café with tables outside                                                                     | café with tables outside                                                               | café with tables outside, cafés and bistros nearby with tables outside                                                                          | cafe with tables outside, outdoor cinema, an adjacent museum garden                              |
| G 2.4                                                                                                                                                                                                     | 1                                                                                            | 2                                                                                                                                                          | 1                                                                                                                               | 0                                                  | 3                                                                                                                                       | 1                                                                                            | 1                                                                                      | 2                                                                                                                                               | 3                                                                                                |
| SUM OF POINTS                                                                                                                                                                                             | 12                                                                                           | 14                                                                                                                                                         | 8                                                                                                                               | 5                                                  | 18                                                                                                                                      | 13                                                                                           | 12                                                                                     | 16                                                                                                                                              | 12                                                                                               |

| Table S3 GOAL 3 evaluation: Environmental issues                                                                                                                                                                                                                            |                                                                                                                                                                                       |                                               |                                              |                           |                                                                                                                                                                                                  |                                                                                                                                              |                                              |                                                                                                                                                                                                    |                                                                                          |
|-----------------------------------------------------------------------------------------------------------------------------------------------------------------------------------------------------------------------------------------------------------------------------|---------------------------------------------------------------------------------------------------------------------------------------------------------------------------------------|-----------------------------------------------|----------------------------------------------|---------------------------|--------------------------------------------------------------------------------------------------------------------------------------------------------------------------------------------------|----------------------------------------------------------------------------------------------------------------------------------------------|----------------------------------------------|----------------------------------------------------------------------------------------------------------------------------------------------------------------------------------------------------|------------------------------------------------------------------------------------------|
|                                                                                                                                                                                                                                                                             | MANGGHA<br>COMPLEX                                                                                                                                                                    | WYSPIANSKI<br>PAVILION                        | AUDITORIUM<br>MAXIMUM                        | OPERA HOUSE               | MOS                                                                                                                                                                                              | CRICOTEKA                                                                                                                                    | MOCAK                                        | ICE                                                                                                                                                                                                | CZAPSKI PAVILION                                                                         |
| QUANTITY OF GREEN INFRASTRUCTURE                                                                                                                                                                                                                                            |                                                                                                                                                                                       |                                               |                                              |                           |                                                                                                                                                                                                  |                                                                                                                                              |                                              |                                                                                                                                                                                                    |                                                                                          |
| Quantity of green infrastructure and water ratio of green areas, number of trees, water present                                                                                                                                                                             | a lot of greenery, water                                                                                                                                                              | a small lawn                                  | single trees                                 | greenery only at the back | small parts of the lawn, individual trees                                                                                                                                                        | a lot of greenery, water                                                                                                                     | a small lawn                                 | lawn, trees, ‘pocket garden’                                                                                                                                                                       | lawn, trees                                                                              |
| G 3.1                                                                                                                                                                                                                                                                       | 4                                                                                                                                                                                     | 2                                             | 2                                            | 1                         | 2                                                                                                                                                                                                | 4                                                                                                                                            | 2                                            | 3                                                                                                                                                                                                  | 3                                                                                        |
| INCORPORATING NATURE                                                                                                                                                                                                                                                        |                                                                                                                                                                                       |                                               |                                              |                           |                                                                                                                                                                                                  |                                                                                                                                              |                                              |                                                                                                                                                                                                    |                                                                                          |
| Maintenance of public greenery - maximum 2 points; 1 point for each: weaving natural elements into parks and playgrounds, designing public spaces to reflect and respond to local geography, supporting direct interaction with nature through free and low-cost activities | 2 points for maintenance of public greenery, space reflects local geography (the café terrace joined with the Vistula boulevard), weaving natural elements into parks (bamboo garden) | two points for maintenance of public greenery | one point for maintenance of public greenery | none                      | 2 points for maintenance of public greenery; weaving natural elements into parks and playgrounds, supporting direct interaction with nature through free and low-cost activities (kinder garden) | two points for maintenance of public greenery, designing space to reflect local geography (the roofed area joined with the Vistula boulevard | one point for maintenance of public greenery | 2 points for maintenance of public greenery; weaving natural elements into parks and playgrounds, supporting direct interaction with nature through free and low-cost activities (Congress Square) | two points for maintenance of public greenery, cinema supporting integration with nature |
| G 3.2                                                                                                                                                                                                                                                                       | 4                                                                                                                                                                                     | 2                                             | 1                                            | 0                         | 4                                                                                                                                                                                                | 3                                                                                                                                            | 1                                            | 4                                                                                                                                                                                                  | 3                                                                                        |
| PRO-ENVIRONMENTAL SOLUTIONS                                                                                                                                                                                                                                                 |                                                                                                                                                                                       |                                               |                                              |                           |                                                                                                                                                                                                  |                                                                                                                                              |                                              |                                                                                                                                                                                                    |                                                                                          |
| 1-2 points for each: renewable energy solutions, zero waste concept, waste segregation                                                                                                                                                                                      | waste segregation                                                                                                                                                                     | waste segregation                             | waste segregation                            | waste segregation         | waste segregation                                                                                                                                                                                | waste segregation                                                                                                                            | waste segregation                            | waste segregation                                                                                                                                                                                  | waste segregation                                                                        |
| G 3.3                                                                                                                                                                                                                                                                       | 1                                                                                                                                                                                     | 1                                             | 1                                            | 1                         | 1                                                                                                                                                                                                | 1                                                                                                                                            | 1                                            | 1                                                                                                                                                                                                  | 1                                                                                        |
| LOWERING THE EFFECT OF URBAN HEAT ISLAND                                                                                                                                                                                                                                    |                                                                                                                                                                                       |                                               |                                              |                           |                                                                                                                                                                                                  |                                                                                                                                              |                                              |                                                                                                                                                                                                    |                                                                                          |
| 1 point for each: natural or artificial shading (trees or roof above the outside space), light colour of the building, green walls or vertical gardens, green/cool roof, water nearby                                                                                       | the light colour of the building, water nearby (Vistula river)                                                                                                                        | vertical garden                               | none                                         | none                      | roofing of outdoor space                                                                                                                                                                         | roofing of outdoor space, water nearby (Vistula river)                                                                                       | roofing of outdoor space                     | none                                                                                                                                                                                               | white building                                                                           |
| G 3.4                                                                                                                                                                                                                                                                       | 1                                                                                                                                                                                     | 1                                             | 0                                            | 0                         | 1                                                                                                                                                                                                | 2                                                                                                                                            | 1                                            | 0                                                                                                                                                                                                  | 1                                                                                        |
| SUM OF POINTS                                                                                                                                                                                                                                                               | 10                                                                                                                                                                                    | 6                                             | 4                                            | 2                         | 8                                                                                                                                                                                                | 10                                                                                                                                           | 5                                            | 8                                                                                                                                                                                                  | 8                                                                                        |

| Table S4 GOAL 4 evaluation: Morphology, aesthetics                                                                                                                                                                                                              |                                                                                                                         |                                                                                                                                     |                                                                                                                                 |                                                                                                |                                                                                                                               |                                                                                                                      |                                                                                                                      |                                                                                                                                |                                                                                                                        |
|-----------------------------------------------------------------------------------------------------------------------------------------------------------------------------------------------------------------------------------------------------------------|-------------------------------------------------------------------------------------------------------------------------|-------------------------------------------------------------------------------------------------------------------------------------|---------------------------------------------------------------------------------------------------------------------------------|------------------------------------------------------------------------------------------------|-------------------------------------------------------------------------------------------------------------------------------|----------------------------------------------------------------------------------------------------------------------|----------------------------------------------------------------------------------------------------------------------|--------------------------------------------------------------------------------------------------------------------------------|------------------------------------------------------------------------------------------------------------------------|
|                                                                                                                                                                                                                                                                 | MANGGHA COMPLEX                                                                                                         | WYSPIANSKI PAVILION                                                                                                                 | AUDITORIUM MAXIMUM                                                                                                              | OPERA HOUSE                                                                                    | MOS                                                                                                                           | CRICOTEKA                                                                                                            | MOCAK                                                                                                                | ICE                                                                                                                            | CZAPSKI PAVILION                                                                                                       |
| URBAN MORPHOLOGY                                                                                                                                                                                                                                                |                                                                                                                         |                                                                                                                                     |                                                                                                                                 |                                                                                                |                                                                                                                               |                                                                                                                      |                                                                                                                      |                                                                                                                                |                                                                                                                        |
| 1/0 point for each: compact, coherent pattern of development / urban sprawl, fragmented structures; pedestrian scale / high-rise buildings; dense street network / large urban blocks; cul-de-sacs / natural surveillance; elements of cultural heritage / none | a compact pattern of development, pedestrian scale, dense street network, natural surveillance                          | a compact pattern of development, pedestrian scale, dense street network, natural surveillance, cultural heritage                   | a compact pattern of development, pedestrian scale, dense street network, natural surveillance, cultural heritage               | a compact pattern of development, pedestrian scale, dense street network, natural surveillance | a compact pattern of development, pedestrian scale, dense street network, natural surveillance, cultural heritage             | a compact pattern of development, pedestrian scale, dense street network, natural surveillance, cultural heritage    | a compact pattern of development, pedestrian scale, dense street network, natural surveillance, cultural heritage    | a non-coherent pattern of development, pedestrian scale, dense street network, natural surveillance                            | a compact pattern of development, pedestrian scale, dense street network, natural surveillance, cultural heritage      |
| G 4.1                                                                                                                                                                                                                                                           | 4                                                                                                                       | 5                                                                                                                                   | 5                                                                                                                               | 4                                                                                              | 5                                                                                                                             | 5                                                                                                                    | 5                                                                                                                    | 5                                                                                                                              | 3                                                                                                                      |
| SOURCES OF AESTHETIC PLEASURE                                                                                                                                                                                                                                   |                                                                                                                         |                                                                                                                                     |                                                                                                                                 |                                                                                                |                                                                                                                               |                                                                                                                      |                                                                                                                      |                                                                                                                                |                                                                                                                        |
| 1 point for each: perceptual innuendo, unexpectedness or whimsy, cultural building incorporated or historical layering or physical juxtaposition, stimulus diversity/spectacle, the possibility of public solitude                                              | unexpectedness or whimsy, physical juxtaposition, the possibility of public solitude                                    | physical juxtaposition, crowding/stimulus diversity/spectacle                                                                       | unexpectedness or whimsy, the possibility of public solitude                                                                    | whimsy, physical juxtaposition                                                                 | perceptual innuendo, unexpectedness or whimsy, physical juxtaposition, public solitude, crowding/stimulus diversity/spectacle | unexpectedness or whimsy, crowding/stimulus diversity/spectacle                                                      | perceptual innuendo, physical juxtaposition                                                                          | public solitude, crowding/stimulus diversity/spectacle, physical juxtaposition                                                 | perceptual innuendo, unexpectedness, physical juxtaposition, the possibility of public solitude                        |
| G 4.2                                                                                                                                                                                                                                                           | 3                                                                                                                       | 1                                                                                                                                   | 2                                                                                                                               | 2                                                                                              | 5                                                                                                                             | 2                                                                                                                    | 2                                                                                                                    | 3                                                                                                                              | 4                                                                                                                      |
| BUILDINGS CREATING ‘A PLACE’                                                                                                                                                                                                                                    |                                                                                                                         |                                                                                                                                     |                                                                                                                                 |                                                                                                |                                                                                                                               |                                                                                                                      |                                                                                                                      |                                                                                                                                |                                                                                                                        |
| 1/0 point for each: closeness / amorphous or overflow of space; concentricity / isolated elements; spirit of place / cliché or uniformity; continuity or historicity / places devoid of “memory”; authenticity / artificiality or commercialization             | the closeness of the space inside the buildings’ site, concentricity, the spirit of the place, continuity, authenticity | the closeness of the space around the building, concentricity, the spirit of the place, continuity, authenticity                    | the closeness of the space around the building, concentricity, the spirit of the place (the Old Town), continuity, authenticity | amorphous surrounding, concentricity, uniformity, historicity                                  | the closeness of the space of the building complex, concentricity, the spirit of the place, continuity, authenticity          | the closeness of the space of the building complex, concentricity, the spirit of the place, continuity, authenticity | the closeness of the space of the building complex, concentricity, the spirit of the place, continuity, authenticity | overflow of space on one side of the building, concentricity on the other, the spirit of place, memoryless place, authenticity | the closeness of the space of the building complex, concentricity, the spirit of the place, continuity, authenticity   |
| G 4.3                                                                                                                                                                                                                                                           | 5                                                                                                                       | 5                                                                                                                                   | 5                                                                                                                               | 3                                                                                              | 5                                                                                                                             | 5                                                                                                                    | 5                                                                                                                    | 3                                                                                                                              | 5                                                                                                                      |
| GROUNDFLOOR FRONTAGES ANALYSIS                                                                                                                                                                                                                                  |                                                                                                                         |                                                                                                                                     |                                                                                                                                 |                                                                                                |                                                                                                                               |                                                                                                                      |                                                                                                                      |                                                                                                                                |                                                                                                                        |
| Gehl’s method adopted: result A (active)-5 points, B (pleasant)-4 points, C (somewhere in-between)-3 points, D (dull)-2 points, E (inactive)-1 point, F(parking garage structure)-0.                                                                            | B: small units, a few closed or passive units, some relief in frontages, good detailing                                 | A: small units, many doors, no closed or passive units, interesting relief in frontages, good quality materials and refined details | C/D, inactive wide fronts but there is some detail, monumental facades                                                          | C/D, inactive wide fronts, only some detail, horizontal articulation of the facades            | B: small units, a few closed or passive units, some relief in frontages, good detailing                                       | B: small units, a few closed or passive units, some relief in frontages, good detailing                              | C/D, inactive wide fronts, some detail                                                                               | D, inactive wide fronts, some detail                                                                                           | B: small units, a few closed or passive units, some relief in frontages, good detailing, glass pavilion, much greenery |
| G 4.4                                                                                                                                                                                                                                                           | 4                                                                                                                       | 5                                                                                                                                   | 2                                                                                                                               | 2                                                                                              | 4                                                                                                                             | 4                                                                                                                    | 2                                                                                                                    | 2                                                                                                                              | 4                                                                                                                      |
| SUM OF POINTS                                                                                                                                                                                                                                                   | 16                                                                                                                      | 16                                                                                                                                  | 14                                                                                                                              | 11                                                                                             | 19                                                                                                                            | 16                                                                                                                   | 14                                                                                                                   | 11                                                                                                                             | 18                                                                                                                     |

Table S5 GOAL 5 evaluation: Comfort and sociability

|                                                                                                                                                                                                                                                      | MANGGHA<br>COMPLEX                                                                                                          | WYSPIANSKI<br>PAVILION                                                                                      | AUDITORIUM<br>MAXIMUM                                                              | OPERA HOUSE                                     | MOS                                                        | CRICOTEKA                                                                                           | MOCAK                                                                                             | ICE                                              | CZAPSKI<br>PAVILION                                                   |
|------------------------------------------------------------------------------------------------------------------------------------------------------------------------------------------------------------------------------------------------------|-----------------------------------------------------------------------------------------------------------------------------|-------------------------------------------------------------------------------------------------------------|------------------------------------------------------------------------------------|-------------------------------------------------|------------------------------------------------------------|-----------------------------------------------------------------------------------------------------|---------------------------------------------------------------------------------------------------|--------------------------------------------------|-----------------------------------------------------------------------|
| CLEANLINESS                                                                                                                                                                                                                                          |                                                                                                                             |                                                                                                             |                                                                                    |                                                 |                                                            |                                                                                                     |                                                                                                   |                                                  |                                                                       |
| 1 point for each: lack of rubbish, lack of neglected building elements, lack of homeless people, lack of traces of insufficient protection (graffiti, broken windows, alcohol bottles), lack of noise pollution at a level that endangers the health | the building became dirty, neglected, litter bins and rubbish lying on the premises at the rear entrance, noise LDWN >65 dB | decaying building (renovation of the façade has begun) contaminated by pigeons, presence of homeless people | fallen leaves lying around, noise LDWN 60-70 dB                                    | rubbish lying around, noise level LDWN 60-75 dB | neighbouring buildings decaying                            | clean surrounding                                                                                   | rusty bars, crumpled sheet metal, dirty walls, garbage cans visible behind the bars on the street | neglected vacancy, noise level LDWN 60-75 dB     | clean surrounding                                                     |
| G 5.1                                                                                                                                                                                                                                                | 2                                                                                                                           | 2                                                                                                           | 3                                                                                  | 3                                               | 4                                                          | 5                                                                                                   | 3                                                                                                 | 3                                                | 5                                                                     |
| SOCIAL CAPITAL                                                                                                                                                                                                                                       |                                                                                                                             |                                                                                                             |                                                                                    |                                                 |                                                            |                                                                                                     |                                                                                                   |                                                  |                                                                       |
| 0-2 point for the number of instaposts; 1 point for each: restaurant / bistro / cafe, presence of collective action, events, a good number of people (not too crowded)                                                                               | cafe, 149 instaposts                                                                                                        | 15 instaposts, collective actions in the surroundings, the building in the crowded area                     | bistro, 1132 instaposts, collective events,                                        | 1900 Instagram followers, collective events,    | cafe, 396 observers, 31 instaposts, collective events      | cafe, 2700 Instagram followers, collective actions, events                                          | cafe, 28,2 thousand Instagram followers, collective events on Lipska St.                          | pastry shop, 4034 followers, 1253 instaposts     | café, outdoor cinema, a good amount of people                         |
| G 5.2                                                                                                                                                                                                                                                | 1                                                                                                                           | 2                                                                                                           | 4                                                                                  | 3                                               | 2                                                          | 4                                                                                                   | 5                                                                                                 | 5                                                | 2                                                                     |
| OUTDOOR SEATS                                                                                                                                                                                                                                        |                                                                                                                             |                                                                                                             |                                                                                    |                                                 |                                                            |                                                                                                     |                                                                                                   |                                                  |                                                                       |
| 1 point each for: sufficient number of seats, seats under a roof, free use of seats, sitting in groups possible, informal seating, i.e. other than benches                                                                                           | 1 bench + cafe chairs, free seating, sitting on the border of the boulevards, sitting under umbrellas                       | 6 benches, free seating, sitting in groups                                                                  | seating stairs, benches, seating in groups, informal seating (amphitheatre stairs) | none                                            | many seats also under the roof, possible sitting in groups | 34 seats under the roof, free, sun loungers; stairs and boulevard railing as informal places to sit | 4 chairs + many café chairs, free use                                                             | about 60 seats, free, sitting in groups possible | 1 bench + café chairs, free use, the possibility of sitting in groups |
| G 5.3                                                                                                                                                                                                                                                | 4                                                                                                                           | 3                                                                                                           | 3                                                                                  | 0                                               | 3                                                          | 4                                                                                                   | 2                                                                                                 | 3                                                | 3                                                                     |
| OTHER ELEMENTS OF SMALL ARCHITECTURE                                                                                                                                                                                                                 |                                                                                                                             |                                                                                                             |                                                                                    |                                                 |                                                            |                                                                                                     |                                                                                                   |                                                  |                                                                       |
| 1 point for each: roofing of outdoor space, art (sculptures, murals, etc.), other street furniture, furniture for children, seniors or disabled (e.g. blind)                                                                                         | art in front of the building, tea pavilion                                                                                  | Dietl’s monument, mockup of the place for blind people in an adjacent square                                | amphitheatre stairs to sit on                                                      | art, roofing                                    | roofing, bike stand as art, mural                          | roofing, typographic on the floor                                                                   | roofing, sculptures                                                                               | roofing and art                                  | lapidarium nearby, outdoor cinema screen                              |
| G 5.4                                                                                                                                                                                                                                                | 2                                                                                                                           | 2                                                                                                           | 1                                                                                  | 2                                               | 3                                                          | 2                                                                                                   | 2                                                                                                 | 1                                                | 2                                                                     |
| SUM OF POINTS                                                                                                                                                                                                                                        | 9                                                                                                                           | 9                                                                                                           | 11                                                                                 | 8                                               | 12                                                         | 15                                                                                                  | 12                                                                                                | 12                                               | 12                                                                    |



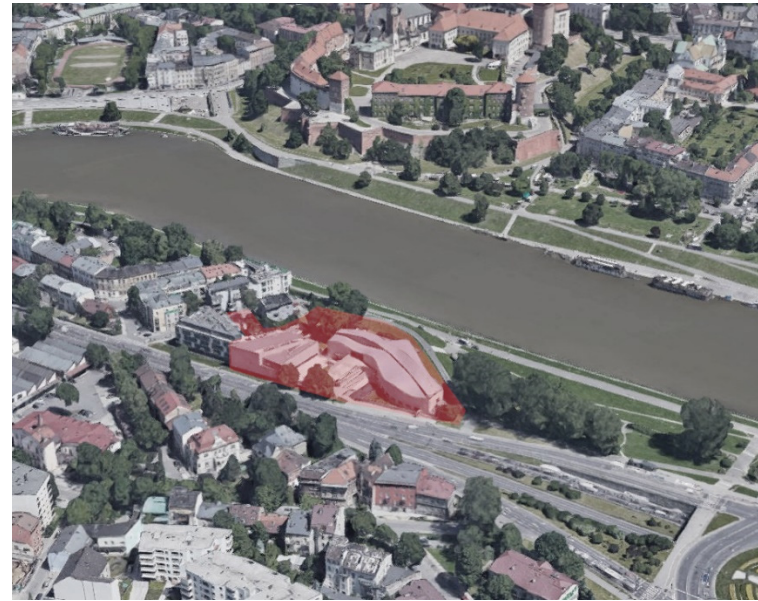

(a)

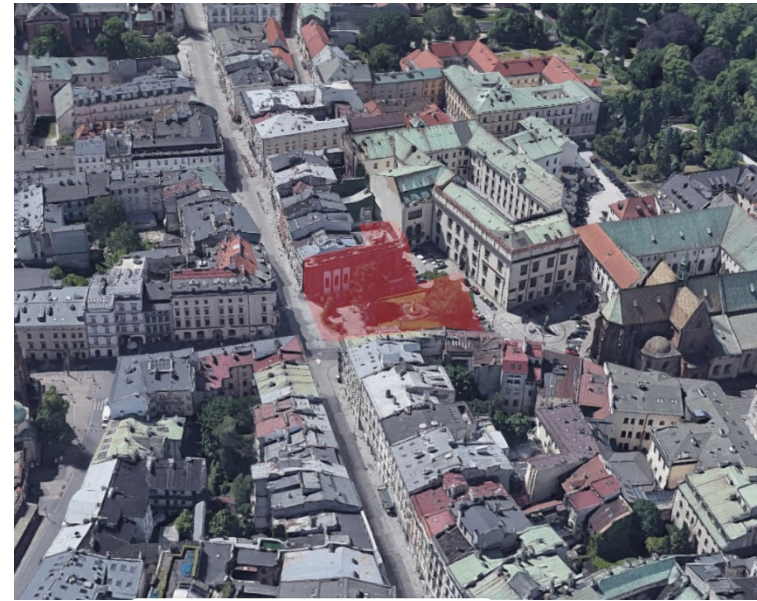

(b)

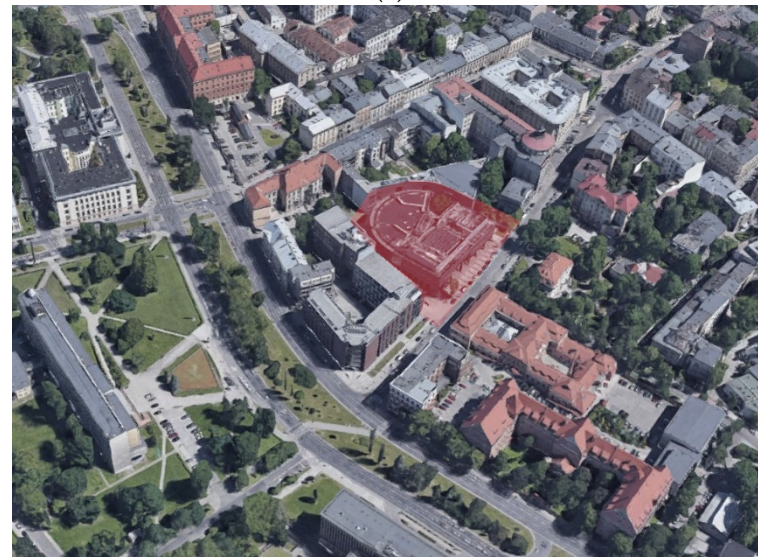

(c)

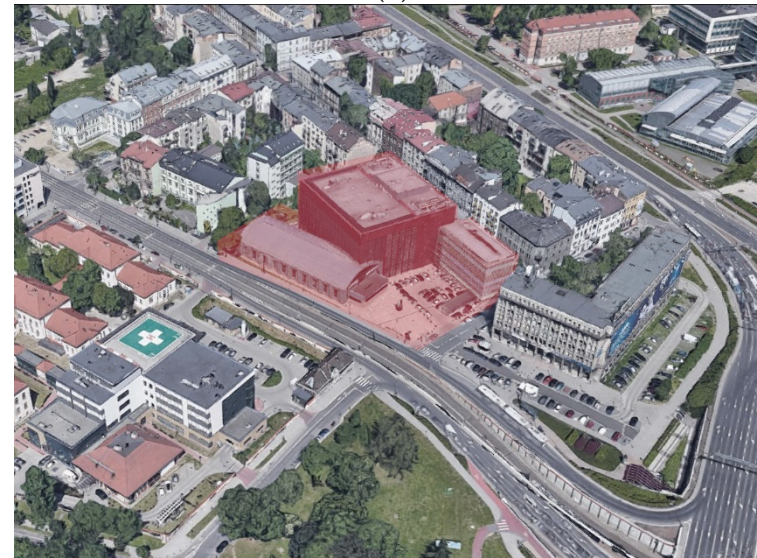

(d)

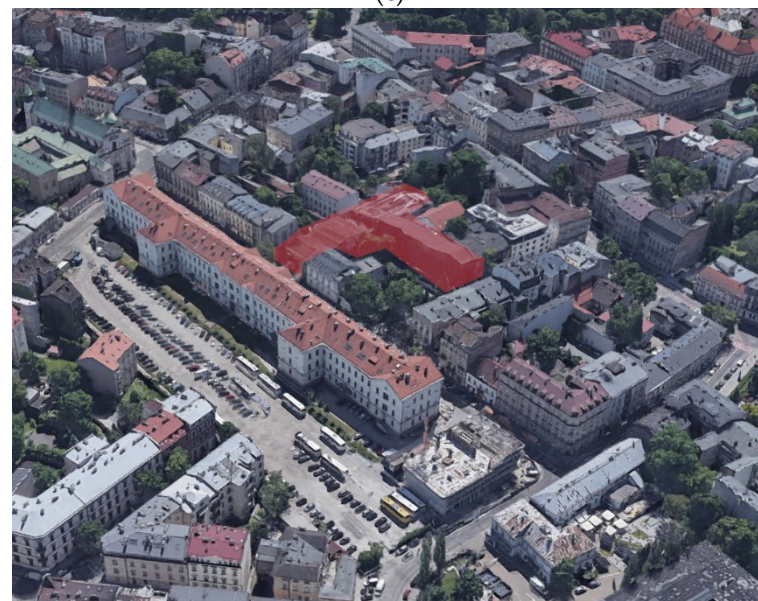

(e)

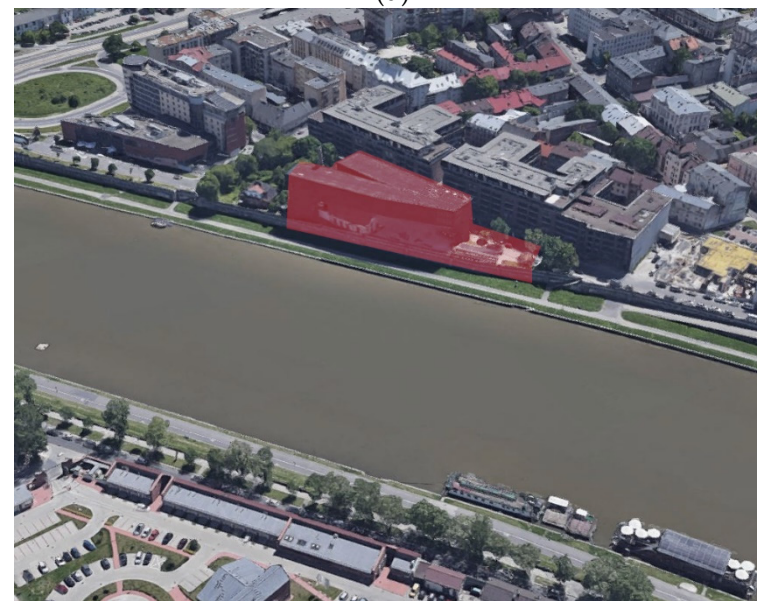

(f)

**Figure S1A.** Areas regarded as the surroundings of buildings, analyzed as the area of the cases – marked as red areas (a) Manggha museum; (b) Wyspianski Pavilion; (c) Auditorium Maximum; (d) The Opera House; (e) MOS; (f) Cricoteka. Elaborated by the author using Google Earth.



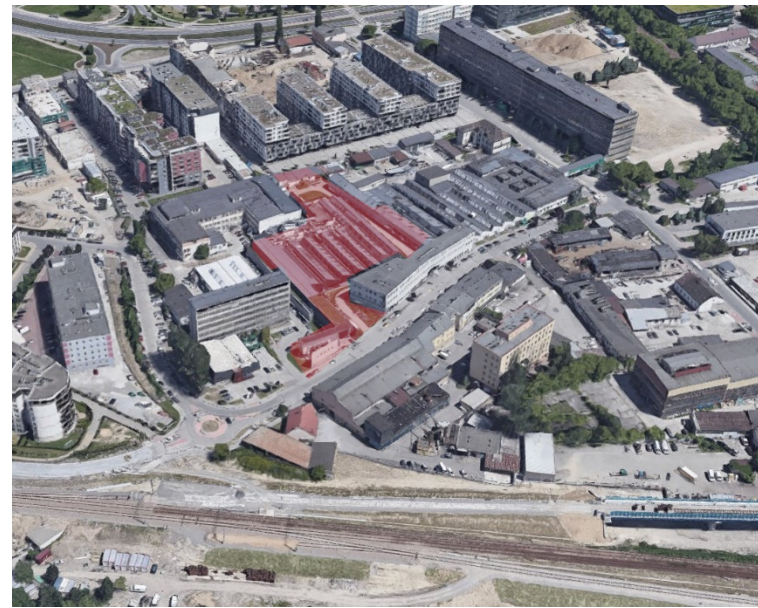

(a)

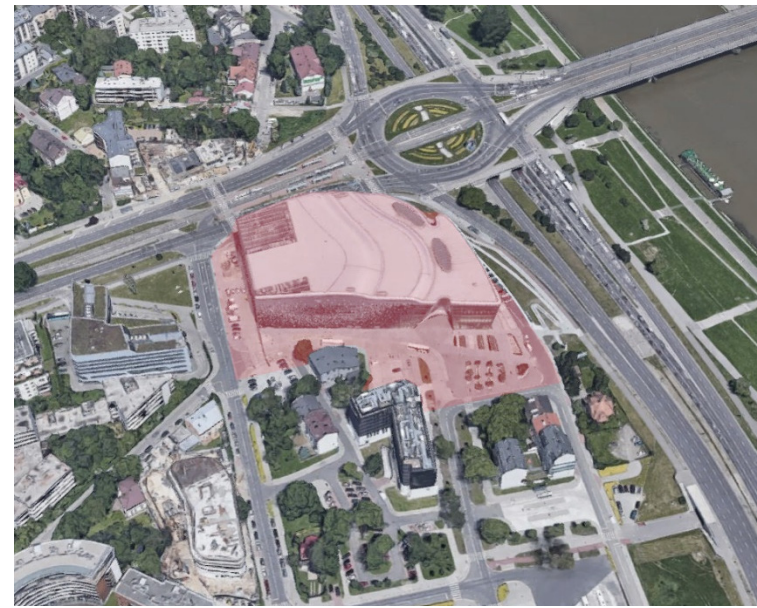

(b)

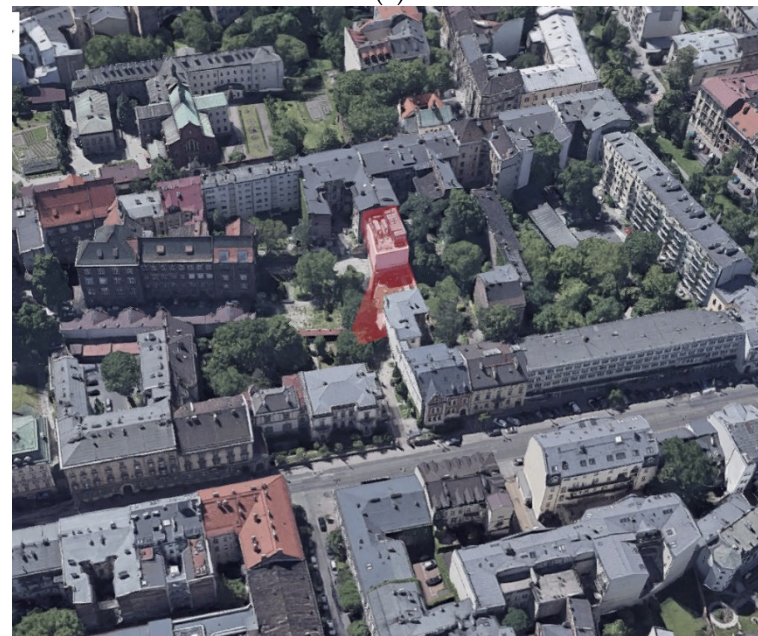

(c)

**Figure S2A.** Areas regarded as the surroundings of buildings analyzed as the area of the cases – marked as red areas. (a) MOCAR; (b) ICE; (c) Czapski Pavilion. Elaborated by the author using Google Earth.
