# Supplementary material
Source: MDPI journal article supplement (https://www.mdpi.com/2071-1050/13/11/6126)
Supplement: s1 [file s1]

## Supplementary Materials S2

The survey detailed results.

|                            |                                                                                                |     |     |    |    |    |                                                                       |
|----------------------------|------------------------------------------------------------------------------------------------|-----|-----|----|----|----|-----------------------------------------------------------------------|
| 1.                         | How old are you?                                                                               |     |     |    |    |    |                                                                       |
| <input type="checkbox"/>   | 18-26                                                                                          | 66  | 173 |    |    |    |                                                                       |
| <input type="checkbox"/>   | 27-35                                                                                          | 18  |     |    |    |    |                                                                       |
| <input type="checkbox"/>   | 36-59                                                                                          | 44  |     |    |    |    |                                                                       |
| <input type="checkbox"/>   | 60 or more                                                                                     | 45  |     |    |    |    |                                                                       |
| 2.                         | What is your education?                                                                        |     |     |    |    |    |                                                                       |
| <input type="checkbox"/>   | primary                                                                                        | 13  |     |    |    |    |                                                                       |
| <input type="checkbox"/>   | lower secondary                                                                                | 25  |     |    |    |    |                                                                       |
| <input type="checkbox"/>   | vocational                                                                                     | 1   |     |    |    |    |                                                                       |
| <input type="checkbox"/>   | upper secondary                                                                                | 38  |     |    |    |    |                                                                       |
| <input type="checkbox"/>   | higher                                                                                         | 96  |     |    |    |    |                                                                       |
| 3.                         | Do you have a profession related to art (painter, sculptor, architect, actor, musician, etc.)? |     |     |    |    |    |                                                                       |
| <input type="checkbox"/>   | Yes                                                                                            | 45  |     |    |    |    |                                                                       |
| <input type="checkbox"/>   | No                                                                                             | 128 |     |    |    |    |                                                                       |
| 4.                         | How many years have you lived in Krakow?                                                       |     |     |    |    |    |                                                                       |
| <input type="checkbox"/>   | Less than a year                                                                               | 3   |     |    |    |    |                                                                       |
| <input type="checkbox"/>   | 1-2 years                                                                                      | 8   |     |    |    |    |                                                                       |
| <input type="checkbox"/>   | 2-5 years                                                                                      | 8   |     |    |    |    |                                                                       |
| <input type="checkbox"/>   | 5-10 years                                                                                     | 8   |     |    |    |    |                                                                       |
| <input type="checkbox"/>   | Over 10 years                                                                                  | 146 |     |    |    |    |                                                                       |
| 5.                         | How often do you use the city's cultural offer (exhibitions, cinema, theatre, etc.)?           |     |     |    |    |    |                                                                       |
| <input type="checkbox"/>   | Several times a month                                                                          | 36  |     |    |    |    |                                                                       |
| <input type="checkbox"/>   | About once a month                                                                             | 62  |     |    |    |    |                                                                       |
| <input type="checkbox"/>   | About once a quarter                                                                           | 50  |     |    |    |    |                                                                       |
| <input type="checkbox"/>   | 1-2 times a year                                                                               | 17  |     |    |    |    |                                                                       |
| <input type="checkbox"/>   | Less often or not at all                                                                       | 8   |     |    |    |    |                                                                       |
| OPERA HOUSE                |                                                                                                |     |     |    |    |    |                                                                       |
| Do you know this building? |                                                                                                |     |     |    |    |    |                                                                       |
| <input type="checkbox"/>   | I do not know it                                                                               | 9   |     |    |    |    |                                                                       |
| <input type="checkbox"/>   | I only saw it in the pictures                                                                  | 7   |     |    |    |    |                                                                       |
| <input type="checkbox"/>   | I walked by                                                                                    | 36  |     |    |    |    |                                                                       |
| <input type="checkbox"/>   | I have already been inside                                                                     | 121 |     |    |    |    |                                                                       |
|                            |                                                                                                | 2   | 1   | 0  | -1 | -2 | PTS.                                                                  |
| 1.                         | I remember this place very well.                                                               | 68  | 56  | 29 | 14 | 6  | 166                                                                   |
|                            |                                                                                                |     |     |    |    |    | I do not remember this place or I did not pay attention to the space. |
| 2.                         | It is quite easy to get there on foot, by public transport or by bike.                         | 97  | 34  | 35 | 4  | 3  | 218                                                                   |
|                            |                                                                                                |     |     |    |    |    | You have to go there by car.                                          |

|                                                                                 |    |    |    |    |    |      |                                                                                   |
|---------------------------------------------------------------------------------|----|----|----|----|----|------|-----------------------------------------------------------------------------------|
| 3. I like the building very much.                                               | 28 | 52 | 61 | 17 | 15 | 61   | I do not like the building at all.                                                |
| 4. I want to go inside the building.                                            | 19 | 57 | 65 | 22 | 10 | 53   | Walking by, I prefer to bypass this place.                                        |
| 5. I like the building's surrounding very much.                                 | 4  | 50 | 58 | 46 | 15 | -18  | I do not like the building's surrounding at all.                                  |
| 6. I like to spend my time there, there is something to do in the surroundings. | 6  | 26 | 75 | 44 | 22 | -50  | I do not want to spend time in front of the building, e.g. on a bench, in a café. |
| 7. The immediate surroundings of the building is sufficiently spacious.         | 6  | 41 | 63 | 43 | 20 | -30  | I have a feeling of too large and empty or confined space around the building.    |
| 8. There's a lot of greenery around.                                            | 3  | 17 | 55 | 61 | 37 | -112 | There is too little greenery around.                                              |
| 9. I would definitely like to come back there.                                  | 28 | 48 | 83 | 10 | 4  | 86   | I will never come there again.                                                    |
| MOS                                                                             |    |    |    |    |    |      |                                                                                   |
| Do you know this building?                                                      |    |    |    |    |    |      |                                                                                   |
| <input type="checkbox"/> I do not know it                                       | 45 |    |    |    |    |      |                                                                                   |
| <input type="checkbox"/> I only saw it in the pictures                          | 12 |    |    |    |    |      |                                                                                   |
| <input type="checkbox"/> I walked by                                            | 34 |    |    |    |    |      |                                                                                   |
| <input type="checkbox"/> I have already been inside                             | 82 |    |    |    |    |      |                                                                                   |
|                                                                                 | 2  | 1  | 0  | -1 | -2 | PTS. |                                                                                   |
| 1. I remember this place very well.                                             | 71 | 26 | 61 | 11 | 3  | 151  | I do not remember this place or I did not pay attention to the space.             |
| 2. It is quite easy to get there on foot, by public transport or by bike.       | 70 | 34 | 65 | 2  | 1  | 170  | You have to go there by car.                                                      |
| 3. I like the building very much.                                               | 59 | 31 | 77 | 4  | 1  | 143  | I do not like the building at all.                                                |
| 4. I want to go inside the building.                                            | 49 | 40 | 77 | 4  | 1  | 132  | Walking by, I prefer to bypass this place.                                        |
| 5. I like the building's surrounding very much.                                 | 39 | 48 | 79 | 4  | 1  | 120  | I do not like the building's surrounding at all.                                  |
| 6. I like to spend my time there, there is something to do in the surroundings. | 32 | 46 | 85 | 7  | 1  | 101  | I do not want to spend time in front of the building, e.g. on a bench, in a café. |
| 7. The immediate surroundings of the building is sufficiently spacious.         | 34 | 34 | 91 | 11 | 1  | 89   | I have a feeling of too large and empty or confined space around the building.    |
| 8. There's a lot of greenery around.                                            | 13 | 36 | 97 | 24 | 1  | 36   | There is too little greenery around.                                              |

|                                                                                 |    |    |     |    |    |      |                                                                                   |
|---------------------------------------------------------------------------------|----|----|-----|----|----|------|-----------------------------------------------------------------------------------|
| 9. I would definitely like to come back there.                                  | 46 | 38 | 79  | 7  | 0  | 123  | I will never come there again.                                                    |
| CRICOTEKA                                                                       |    |    |     |    |    |      |                                                                                   |
| Do you know this building?                                                      |    |    |     |    |    |      |                                                                                   |
| <input type="checkbox"/> I do not know it                                       | 44 |    |     |    |    |      |                                                                                   |
| <input type="checkbox"/> I only saw it in the pictures                          | 13 |    |     |    |    |      |                                                                                   |
| <input type="checkbox"/> I walked by                                            | 52 |    |     |    |    |      |                                                                                   |
| <input type="checkbox"/> I have already been inside                             | 64 |    |     |    |    |      |                                                                                   |
|                                                                                 | 2  | 1  | 0   | -1 | -2 | PTS. |                                                                                   |
| 1. I remember this place very well.                                             | 67 | 31 | 68  | 1  | 6  | 152  | I do not remember this place or I did not pay attention to the space.             |
| 2. It is quite easy to get there on foot, by public transport or by bike.       | 43 | 46 | 73  | 8  | 3  | 118  | You have to go there by car.                                                      |
| 3. I like the building very much.                                               | 55 | 26 | 79  | 10 | 3  | 120  | I do not like the building at all.                                                |
| 4. I want to go inside the building.                                            | 46 | 31 | 81  | 13 | 2  | 106  | Walking by, I prefer to bypass this place.                                        |
| 5. I like the building's surrounding very much.                                 | 47 | 33 | 83  | 6  | 4  | 113  | I do not like the building's surrounding at all.                                  |
| 6. I like to spend my time there, there is something to do in the surroundings. | 29 | 39 | 94  | 9  | 2  | 84   | I do not want to spend time in front of the building, e.g. on a bench, in a café. |
| 7. The immediate surroundings of the building is sufficiently spacious.         | 37 | 35 | 86  | 14 | 1  | 93   | I have a feeling of too large and empty or confined space around the building.    |
| 8. There's a lot of greenery around.                                            | 12 | 32 | 100 | 24 | 5  | 22   | There is too little greenery around.                                              |
| 9. I would definitely like to come back there.                                  | 42 | 29 | 95  | 7  | 0  | 106  | I will never come there again.                                                    |
| MOCÁK                                                                           |    |    |     |    |    |      |                                                                                   |
| Do you know this building?                                                      |    |    |     |    |    |      |                                                                                   |
| <input type="checkbox"/> I do not know it                                       | 43 |    |     |    |    |      |                                                                                   |
| <input type="checkbox"/> I only saw it in the pictures                          | 18 |    |     |    |    |      |                                                                                   |
| <input type="checkbox"/> I walked by                                            | 22 |    |     |    |    |      |                                                                                   |
| <input type="checkbox"/> I have already been inside                             | 90 |    |     |    |    |      |                                                                                   |
|                                                                                 | 2  | 1  | 0   | -1 | -2 | PTS. |                                                                                   |
| 1. I remember this place very well.                                             | 62 | 29 | 70  | 9  | 3  | 138  | I do not remember this place or I did not pay attention to the space.             |

|                                                                                 |     |    |     |    |    |      |                                                                                   |
|---------------------------------------------------------------------------------|-----|----|-----|----|----|------|-----------------------------------------------------------------------------------|
| 2. It is quite easy to get there on foot, by public transport or by bike.       | 22  | 41 | 85  | 21 | 4  | 56   | You have to go there by car.                                                      |
| 3. I like the building very much.                                               | 32  | 43 | 89  | 8  | 1  | 97   | I do not like the building at all.                                                |
| 4. I want to go inside the building.                                            | 40  | 34 | 88  | 10 | 1  | 102  | Walking by, I prefer to bypass this place.                                        |
| 5. I like the building's surrounding very much.                                 | 11  | 35 | 99  | 23 | 4  | 26   | I do not like the building's surrounding at all.                                  |
| 6. I like to spend my time there, there is something to do in the surroundings. | 15  | 28 | 105 | 21 | 4  | 29   | I do not want to spend time in front of the building, e.g. on a bench, in a café. |
| 7. The immediate surroundings of the building is sufficiently spacious.         | 7   | 35 | 104 | 25 | 2  | 20   | I have a feeling of too large and empty or confined space around the building.    |
| 8. There's a lot of greenery around.                                            | 2   | 16 | 103 | 39 | 13 | -45  | There is too little greenery around.                                              |
| 9. I would definitely like to come back there.                                  | 33  | 35 | 95  | 8  | 2  | 89   | I will never come there again.                                                    |
| ICE                                                                             |     |    |     |    |    |      |                                                                                   |
| Do you know this building?                                                      |     |    |     |    |    |      |                                                                                   |
| <input type="checkbox"/> I do not know it                                       | 30  |    |     |    |    |      |                                                                                   |
| <input type="checkbox"/> I only saw it in the pictures                          | 4   |    |     |    |    |      |                                                                                   |
| <input type="checkbox"/> I walked by                                            | 42  |    |     |    |    |      |                                                                                   |
| <input type="checkbox"/> I have already been inside                             | 97  |    |     |    |    |      |                                                                                   |
|                                                                                 | 2   | 1  | 0   | -1 | -2 | PTS. |                                                                                   |
| 1. I remember this place very well.                                             | 115 | 29 | 23  | 5  | 0  | 254  | I do not remember this place or I did not pay attention to the space.             |
| 2. It is quite easy to get there on foot, by public transport or by bike.       | 106 | 30 | 29  | 3  | 4  | 231  | You have to go there by car.                                                      |
| 3. I like the building very much.                                               | 63  | 47 | 46  | 10 | 6  | 151  | I do not like the building at all.                                                |
| 4. I want to go inside the building.                                            | 59  | 47 | 42  | 18 | 6  | 135  | Walking by, I prefer to bypass this place.                                        |
| 5. I like the building's surrounding very much.                                 | 30  | 46 | 48  | 35 | 13 | 45   | I do not like the building's surrounding at all.                                  |
| 6. I like to spend my time there, there is something to do in the surroundings. | 15  | 42 | 60  | 40 | 15 | 2    | I do not want to spend time in front of the building, e.g. on a bench, in a café. |
| 7. The immediate surroundings of the building is sufficiently spacious.         | 29  | 32 | 54  | 39 | 18 | 15   | I have a feeling of too large and empty or                                        |

|                                                                                 |     |    |    |    |    |      |                                                                                   |
|---------------------------------------------------------------------------------|-----|----|----|----|----|------|-----------------------------------------------------------------------------------|
|                                                                                 |     |    |    |    |    |      | confined space around the building.                                               |
| 8. There's a lot of greenery around.                                            | 7   | 22 | 63 | 49 | 31 | -75  | There is too little greenery around.                                              |
| 9. I would definitely like to come back there.                                  | 45  | 34 | 81 | 4  | 0  | 120  | I will never come there again.                                                    |
| MANGGHA COMPLEX                                                                 |     |    |    |    |    |      |                                                                                   |
| Do you know this building?                                                      |     |    |    |    |    |      |                                                                                   |
| <input type="checkbox"/> I do not know it                                       | 29  |    |    |    |    |      |                                                                                   |
| <input type="checkbox"/> I only saw it in the pictures                          | 6   |    |    |    |    |      |                                                                                   |
| <input type="checkbox"/> I walked by                                            | 35  |    |    |    |    |      |                                                                                   |
| <input type="checkbox"/> I have already been inside                             | 103 |    |    |    |    |      |                                                                                   |
|                                                                                 | 2   | 1  | 0  | -1 | -2 | PTS. |                                                                                   |
| 1. I remember this place very well.                                             | 78  | 36 | 47 | 8  | 2  | 180  | I do not remember this place or I did not pay attention to the space.             |
| 2. It is quite easy to get there on foot, by public transport or by bike.       | 61  | 37 | 60 | 11 | 2  | 144  | You have to go there by car.                                                      |
| 3. I like the building very much.                                               | 51  | 46 | 66 | 6  | 2  | 138  | I do not like the building at all.                                                |
| 4. I want to go inside the building.                                            | 52  | 41 | 65 | 9  | 4  | 128  | Walking by, I prefer to bypass this place.                                        |
| 5. I like the building's surrounding very much.                                 | 41  | 43 | 71 | 11 | 5  | 104  | I do not like the building's surrounding at all.                                  |
| 6. I like to spend my time there, there is something to do in the surroundings. | 32  | 36 | 75 | 23 | 5  | 67   | I do not want to spend time in front of the building, e.g. on a bench, in a café. |
| 7. The immediate surroundings of the building is sufficiently spacious.         | 26  | 41 | 76 | 19 | 9  | 56   | I have a feeling of too large and empty or confined space around the building.    |
| 8. There's a lot of greenery around.                                            | 21  | 38 | 79 | 20 | 13 | 34   | There is too little greenery around.                                              |
| 9. I would definitely like to come back there.                                  | 48  | 39 | 76 | 7  | 1  | 126  | I will never come there again.                                                    |
| WYSPIANSKI PAVILION                                                             |     |    |    |    |    |      |                                                                                   |
| Do you know this building?                                                      |     |    |    |    |    |      |                                                                                   |
| <input type="checkbox"/> I do not know it                                       | 50  |    |    |    |    |      |                                                                                   |
| <input type="checkbox"/> I only saw it in the pictures                          | 5   |    |    |    |    |      |                                                                                   |
| <input type="checkbox"/> I walked by                                            | 43  |    |    |    |    |      |                                                                                   |
| <input type="checkbox"/> I have already been inside                             | 75  |    |    |    |    |      |                                                                                   |
|                                                                                 | 2   | 1  | 0  | -1 | -2 | PTS. |                                                                                   |

|                                                                                 |    |    |     |    |    |      |                                                                                   |
|---------------------------------------------------------------------------------|----|----|-----|----|----|------|-----------------------------------------------------------------------------------|
| 1. I remember this place very well.                                             | 60 | 31 | 72  | 8  | 1  | 141  | I do not remember this place or I did not pay attention to the space.             |
| 2. It is quite easy to get there on foot, by public transport or by bike.       | 86 | 13 | 74  | 0  | 0  | 185  | You have to go there by car.                                                      |
| 3. I like the building very much.                                               | 35 | 39 | 86  | 9  | 3  | 94   | I do not like the building at all.                                                |
| 4. I want to go inside the building.                                            | 27 | 33 | 94  | 13 | 5  | 64   | Walking by, I prefer to bypass this place.                                        |
| 5. I like the building's surrounding very much.                                 | 29 | 49 | 85  | 9  | 0  | 98   | I do not like the building's surrounding at all.                                  |
| 6. I like to spend my time there, there is something to do in the surroundings. | 26 | 35 | 96  | 15 | 0  | 72   | I do not want to spend time in front of the building, e.g. on a bench, in a café. |
| 7. The immediate surroundings of the building is sufficiently spacious.         | 25 | 35 | 92  | 17 | 3  | 62   | I have a feeling of too large and empty or confined space around the building.    |
| 8. There's a lot of greenery around.                                            | 6  | 22 | 102 | 30 | 12 | -20  | There is too little greenery around.                                              |
| 9. I would definitely like to come back there.                                  | 26 | 36 | 102 | 6  | 1  | 80   | I will never come there again.                                                    |
| CZAPSKI PAVILION                                                                |    |    |     |    |    |      |                                                                                   |
| Do you know this building?                                                      |    |    |     |    |    |      |                                                                                   |
| <input type="checkbox"/> I do not know it                                       | 89 |    |     |    |    |      |                                                                                   |
| <input type="checkbox"/> I only saw it in the pictures                          | 19 |    |     |    |    |      |                                                                                   |
| <input type="checkbox"/> I walked by                                            | 23 |    |     |    |    |      |                                                                                   |
| <input type="checkbox"/> I have already been inside                             | 44 |    |     |    |    |      |                                                                                   |
|                                                                                 | 2  | 1  | 0   | -1 | -2 | PTS. |                                                                                   |
| 1. I remember this place very well.                                             | 39 | 15 | 107 | 4  | 5  | 79   | I do not remember this place or I did not pay attention to the space.             |
| 2. It is quite easy to get there on foot, by public transport or by bike.       | 39 | 20 | 111 | 2  | 0  | 96   | You have to go there by car.                                                      |
| 3. I like the building very much.                                               | 37 | 11 | 121 | 2  | 0  | 83   | I do not like the building at all.                                                |
| 4. I want to go inside the building.                                            | 30 | 20 | 117 | 3  | 1  | 75   | Walking by, I prefer to bypass this place.                                        |
| 5. I like the building's surrounding very much.                                 | 28 | 18 | 120 | 5  | 0  | 69   | I do not like the building's surrounding at all.                                  |
| 6. I like to spend my time there, there is something to do in the surroundings. | 19 | 12 | 131 | 9  | 0  | 41   | I do not want to spend time in front of the building, e.g. on a bench, in a café. |

|                                                                                 |    |    |     |    |    |      |                                                                                   |
|---------------------------------------------------------------------------------|----|----|-----|----|----|------|-----------------------------------------------------------------------------------|
| 7. The immediate surroundings of the building is sufficiently spacious.         | 18 | 16 | 127 | 9  | 1  | 41   | I have a feeling of too large and empty or confined space around the building.    |
| 8. There's a lot of greenery around.                                            | 17 | 16 | 126 | 10 | 1  | 38   | There is too little greenery around.                                              |
| 9. I would definitely like to come back there.                                  | 24 | 17 | 126 | 3  | 0  | 62   | I will never come there again.                                                    |
| AUDITORIUM MAXIMUM                                                              |    |    |     |    |    |      |                                                                                   |
| Do you know this building?                                                      |    |    |     |    |    |      |                                                                                   |
| <input type="checkbox"/> I do not know it                                       | 52 |    |     |    |    |      |                                                                                   |
| <input type="checkbox"/> I only saw it in the pictures                          | 7  |    |     |    |    |      |                                                                                   |
| <input type="checkbox"/> I walked by                                            | 18 |    |     |    |    |      |                                                                                   |
| <input type="checkbox"/> I have already been inside                             | 96 |    |     |    |    |      |                                                                                   |
|                                                                                 | 2  | 1  | 0   | -1 | -2 | PTS. |                                                                                   |
| 1. I remember this place very well.                                             | 66 | 33 | 66  | 5  | 3  | 154  | I do not remember this place or I did not pay attention to the space.             |
| 2. It is quite easy to get there on foot, by public transport or by bike.       | 63 | 30 | 78  | 2  | 0  | 154  | You have to go there by car.                                                      |
| 3. I like the building very much.                                               | 33 | 46 | 88  | 6  | 0  | 106  | I do not like the building at all.                                                |
| 4. I want to go inside the building.                                            | 30 | 30 | 97  | 15 | 1  | 73   | Walking by, I prefer to bypass this place.                                        |
| 5. I like the building's surrounding very much.                                 | 10 | 31 | 99  | 29 | 4  | 14   | I do not like the building's surrounding at all.                                  |
| 6. I like to spend my time there, there is something to do in the surroundings. | 10 | 21 | 106 | 30 | 6  | -1   | I do not want to spend time in front of the building, e.g. on a bench, in a café. |
| 7. The immediate surroundings of the building is sufficiently spacious.         | 9  | 23 | 103 | 31 | 7  | -4   | I have a feeling of too large and empty or confined space around the building.    |
| 8. There's a lot of greenery around.                                            | 3  | 15 | 90  | 40 | 16 | -51  | There is too little greenery around.                                              |
| 9. I would definitely like to come back there.                                  | 20 | 38 | 109 | 6  | 0  | 72   | I will never come there again.                                                    |

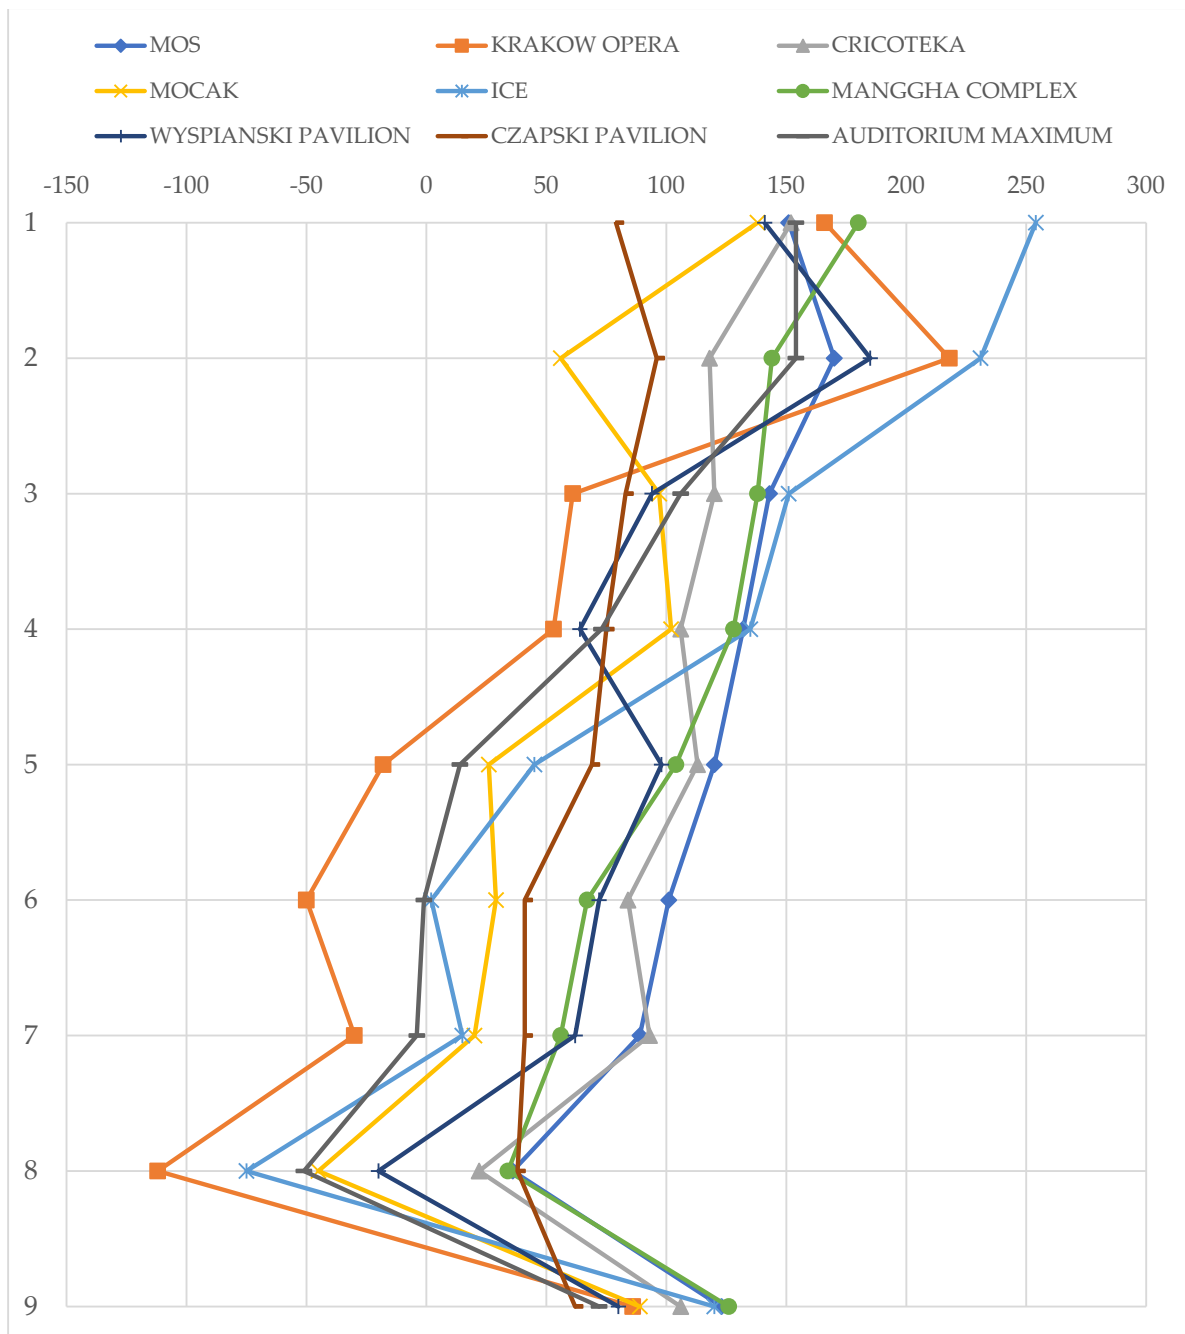

**Figure S1.** The survey results. List of dichotomous answers at either side of the spectrum (from the left): 1. I do not remember this place or I did not pay attention to the space. / I remember this place very well. 2. You have to go there by car. / It is quite easy to get there on foot, by public transport or by bike. 3. I do not like the building at all. / I like the building very much. 4. Walking by, I prefer to bypass this place. / I want to go inside the building. 5. I do not like the building's surrounding at all. / I like the building's surrounding very much. 6. I do not want to spend time in front of the building, e.g. on a bench, in a café. / I like to spend my time there, there is something to do in the surroundings. 7. I have a feeling of too large and empty or confined space around the building. / The immediate surroundings of the building is sufficiently spacious. 8. There is too little greenery around. / There's a lot of greenery around. 9. I will never come there again. / I would definitely like to come back there.
